# Supplementary figures and images for: Graphene Oxide/Cholesterol-Substituted Zinc Phthalocyanine Composites with Enhanced Photodynamic Therapy Properties
Source: MDPI journal article supplement (doi:10.3390/ma16227060), 2023-11-07

## Supplementary Material

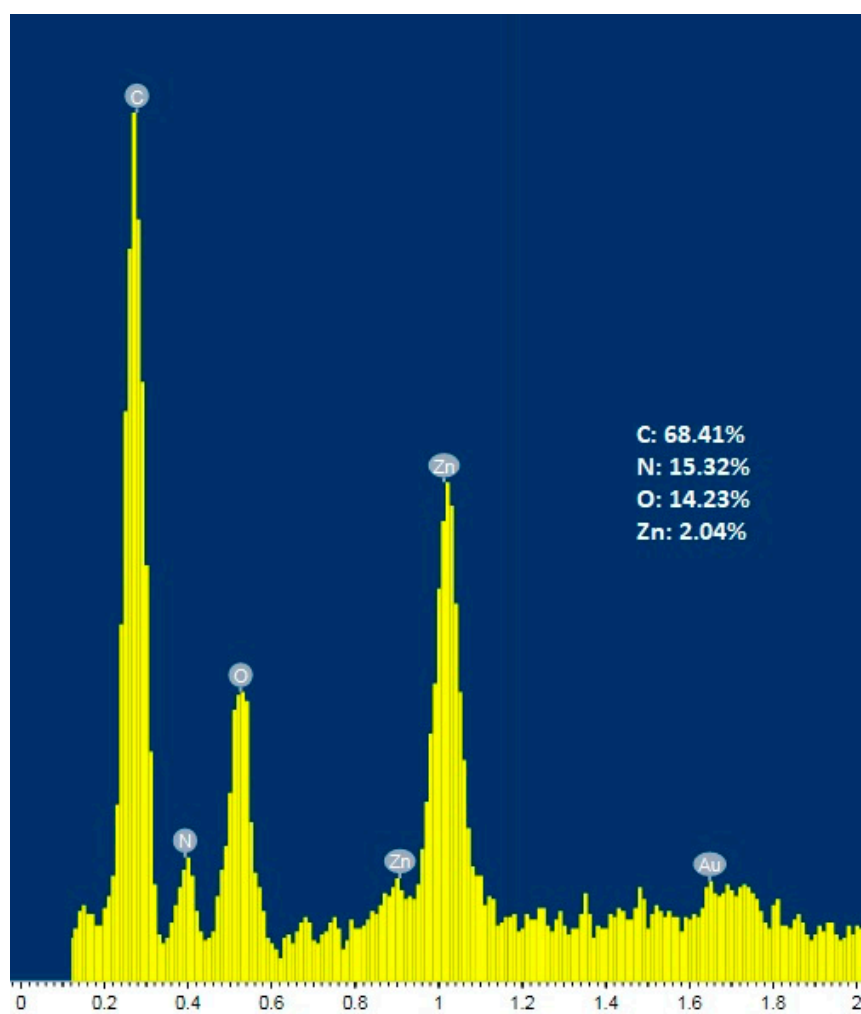

Figure S1. SEM-EDX spectrum of Chol-ZnPc.

Supplement: s1 [file s1]
